# Supplementary material for: Inhibition of N6-Methyladenosine Accumulation by Targeting METTL3 Mitigates Tau Pathology and Cognitive Decline in Alzheimer’s Disease
Source: Research Square preprint supplement (doi:10.21203/rs.3.rs-8379573/v1), 2025-12-19
Supplement: Supplementary file 1 [file 03257a931b77c8060a410f64.docx]

**Inhibition of N6-Methyladenosine Accumulation by Targeting METTL3 Mitigates Tau Pathology and Cognitive Decline in Alzheimer’s Disease**

Allison Tucker 1, 2, 3, Camron Sepehri 1#, Dev Patel 1#, Qingbo Wang 1, 2, Shuo Yuan 1, 2, Eliana Sherman 1, 2, Yicheng Chen 4, Joey Beh 4, Addysen Downey 1, Daniel Goldberg 1, Weronika Gniadzik 1, 2, 3, Xin Ma 4, Lulu Jiang 1, 2, 3*

1Department of Neuroscience, 2Center for Brain Immunology and Glia (BIG), University of Virginia School of Medicine, Charlottesville, VA 22908

3Neuroscience Graduate Program, University of Virginia, Charlottesville, VA 22908

4Department of Chemistry, College of Arts and Sciences, University of Virginia, Charlottesville, VA 22908

***** Correspondence should be addressed to: jiang.lulu@virginia.edu

**#** These authors contributed equally.

**Running title:** Removing excessive RNA methylation Protects Against AD

**List of Extended Data**

Extended Data Figure 1. m6A levels change between 5 months and 9 months in WT and PS19 mice, related to Figure 2.

Extended Data Figure 2. Extended Data Figure 2. Impact of STM2457 treatment on ALKBH5 protein levels in PS19 and WT mice, related to Figure 3.

Extended Data Figure 3. Representative Images of the CA3 and CTX levels of MC1 tau in PS19 control and STM2457 treated mice, related to Figure 5.


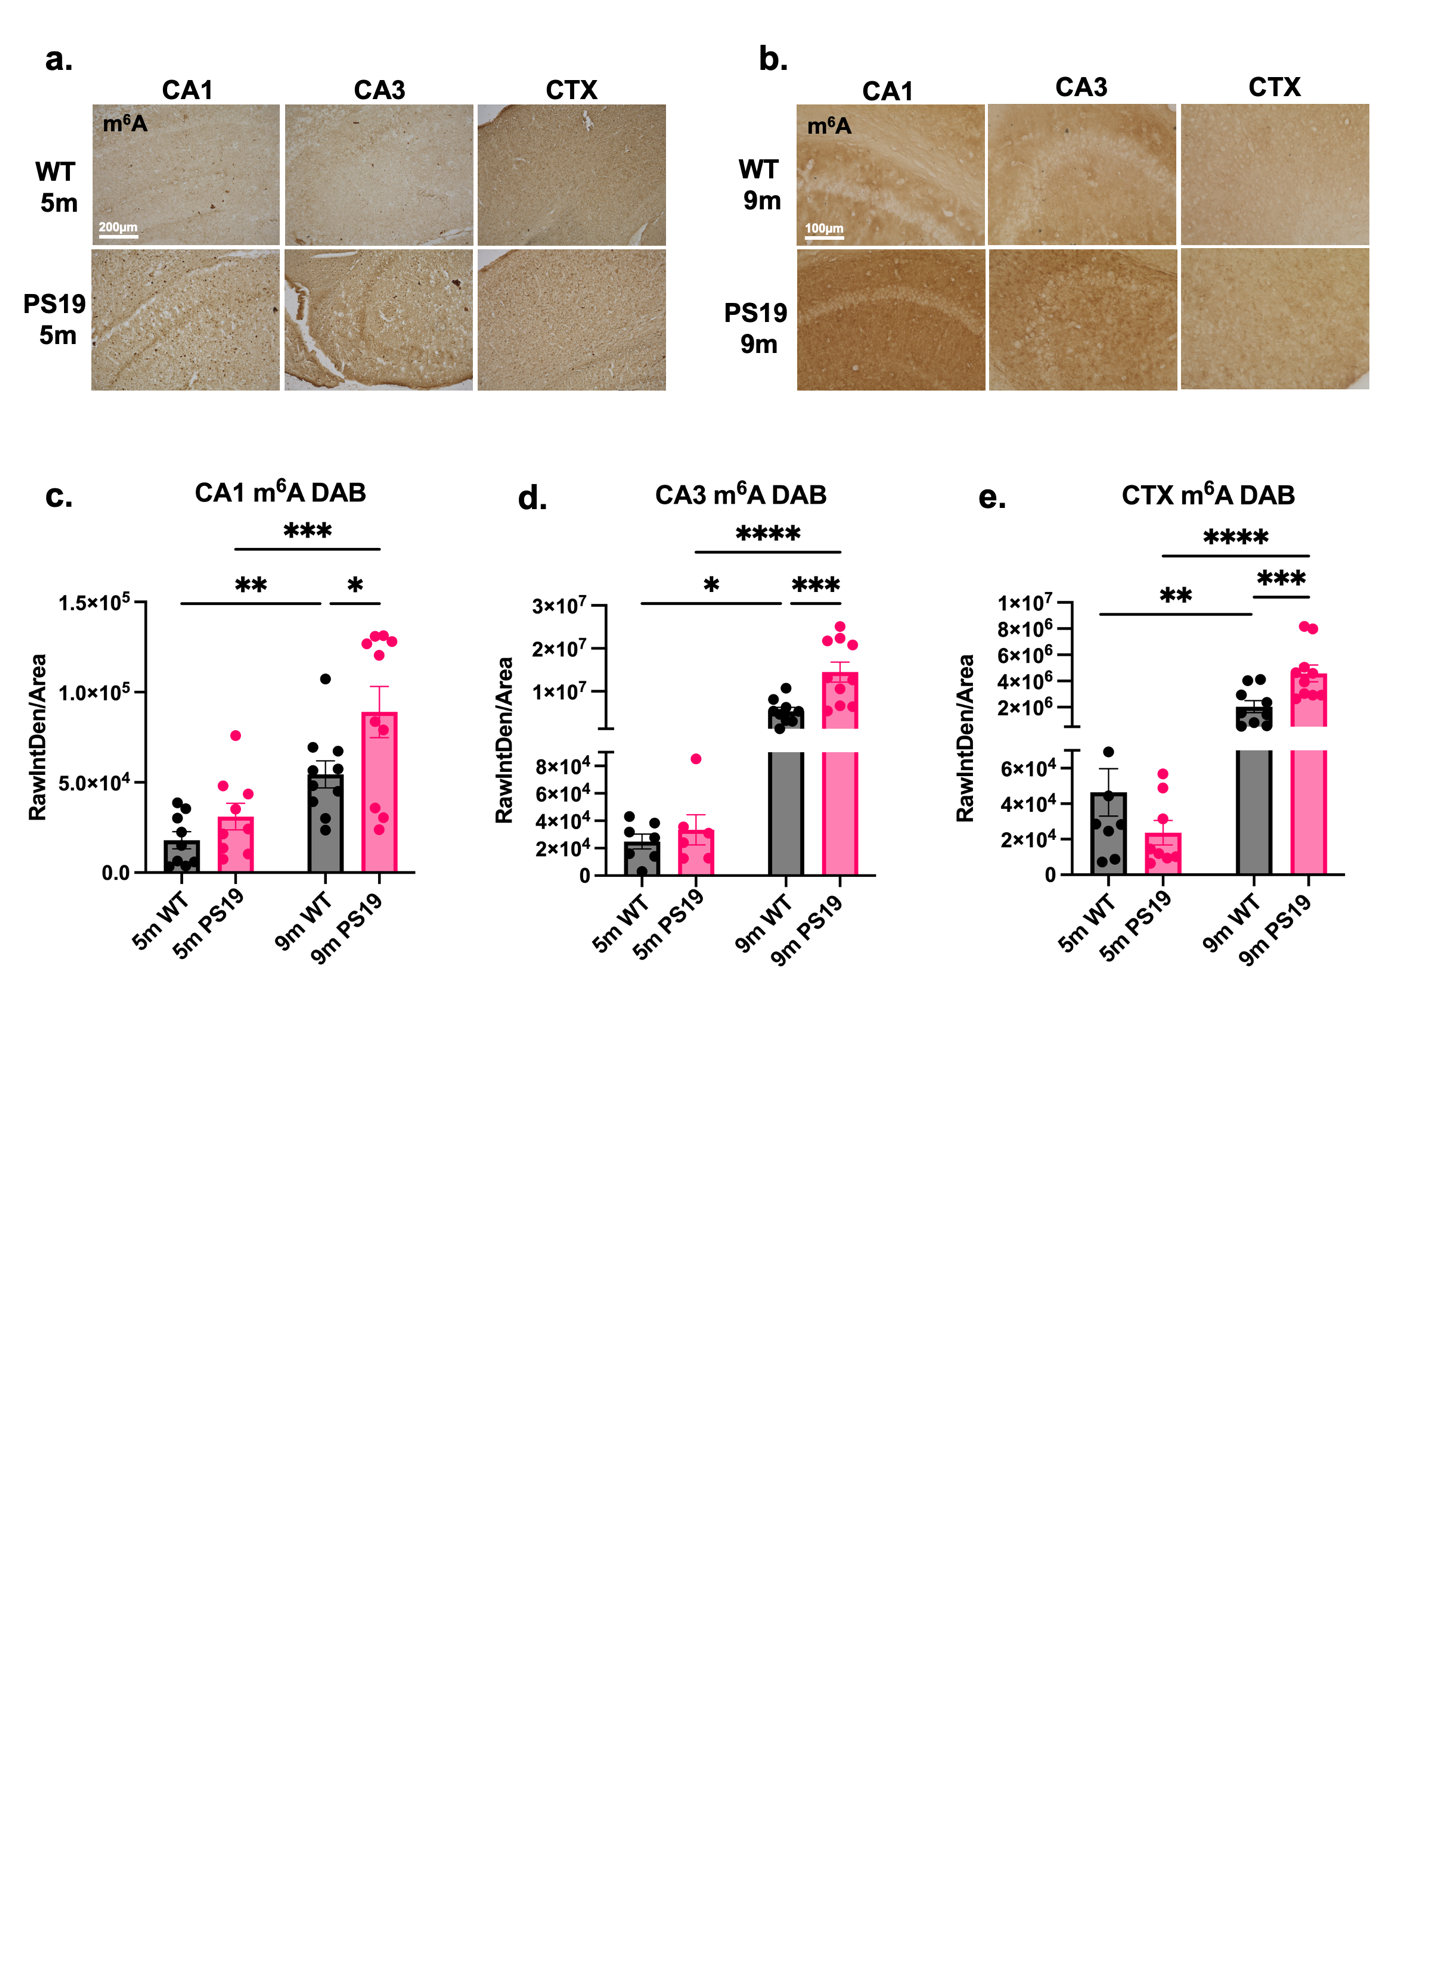
**Extended Data Figure 1. Levels of m6A Increase between 5 months and 9 months in WT and PS19 mice, related to Figure 2. (a),** Representative images of m6A DAB staining in the CA1, CA3, and cortex (CTX) of 5-month-old WT and PS19 mice. Scale bar = 200µm. **(b),** Representative images of m6A DAB staining in the CA1, CA3, and CTX of 9-month-old WT and PS19 mice. Scale bar = 100µm. **c-e,** Quantification of the raw integrated density (RawIntDen) in m6A DAB staining of the **(c)**, CA1, **(d)**, CA3, and **(e)**, CTX of 5-month-old and 9-month-old WT and PS19 mice. **p*<0.05, ***p*<0.01, ****p*<0.005, *****p*<0.001. *N* = 3 brains per condition, *n* = 9 sections per condition. Error bars = SEM. Statistical analysis performed using two-way ANOVA with Tukey’s multiple comparisons test.

**
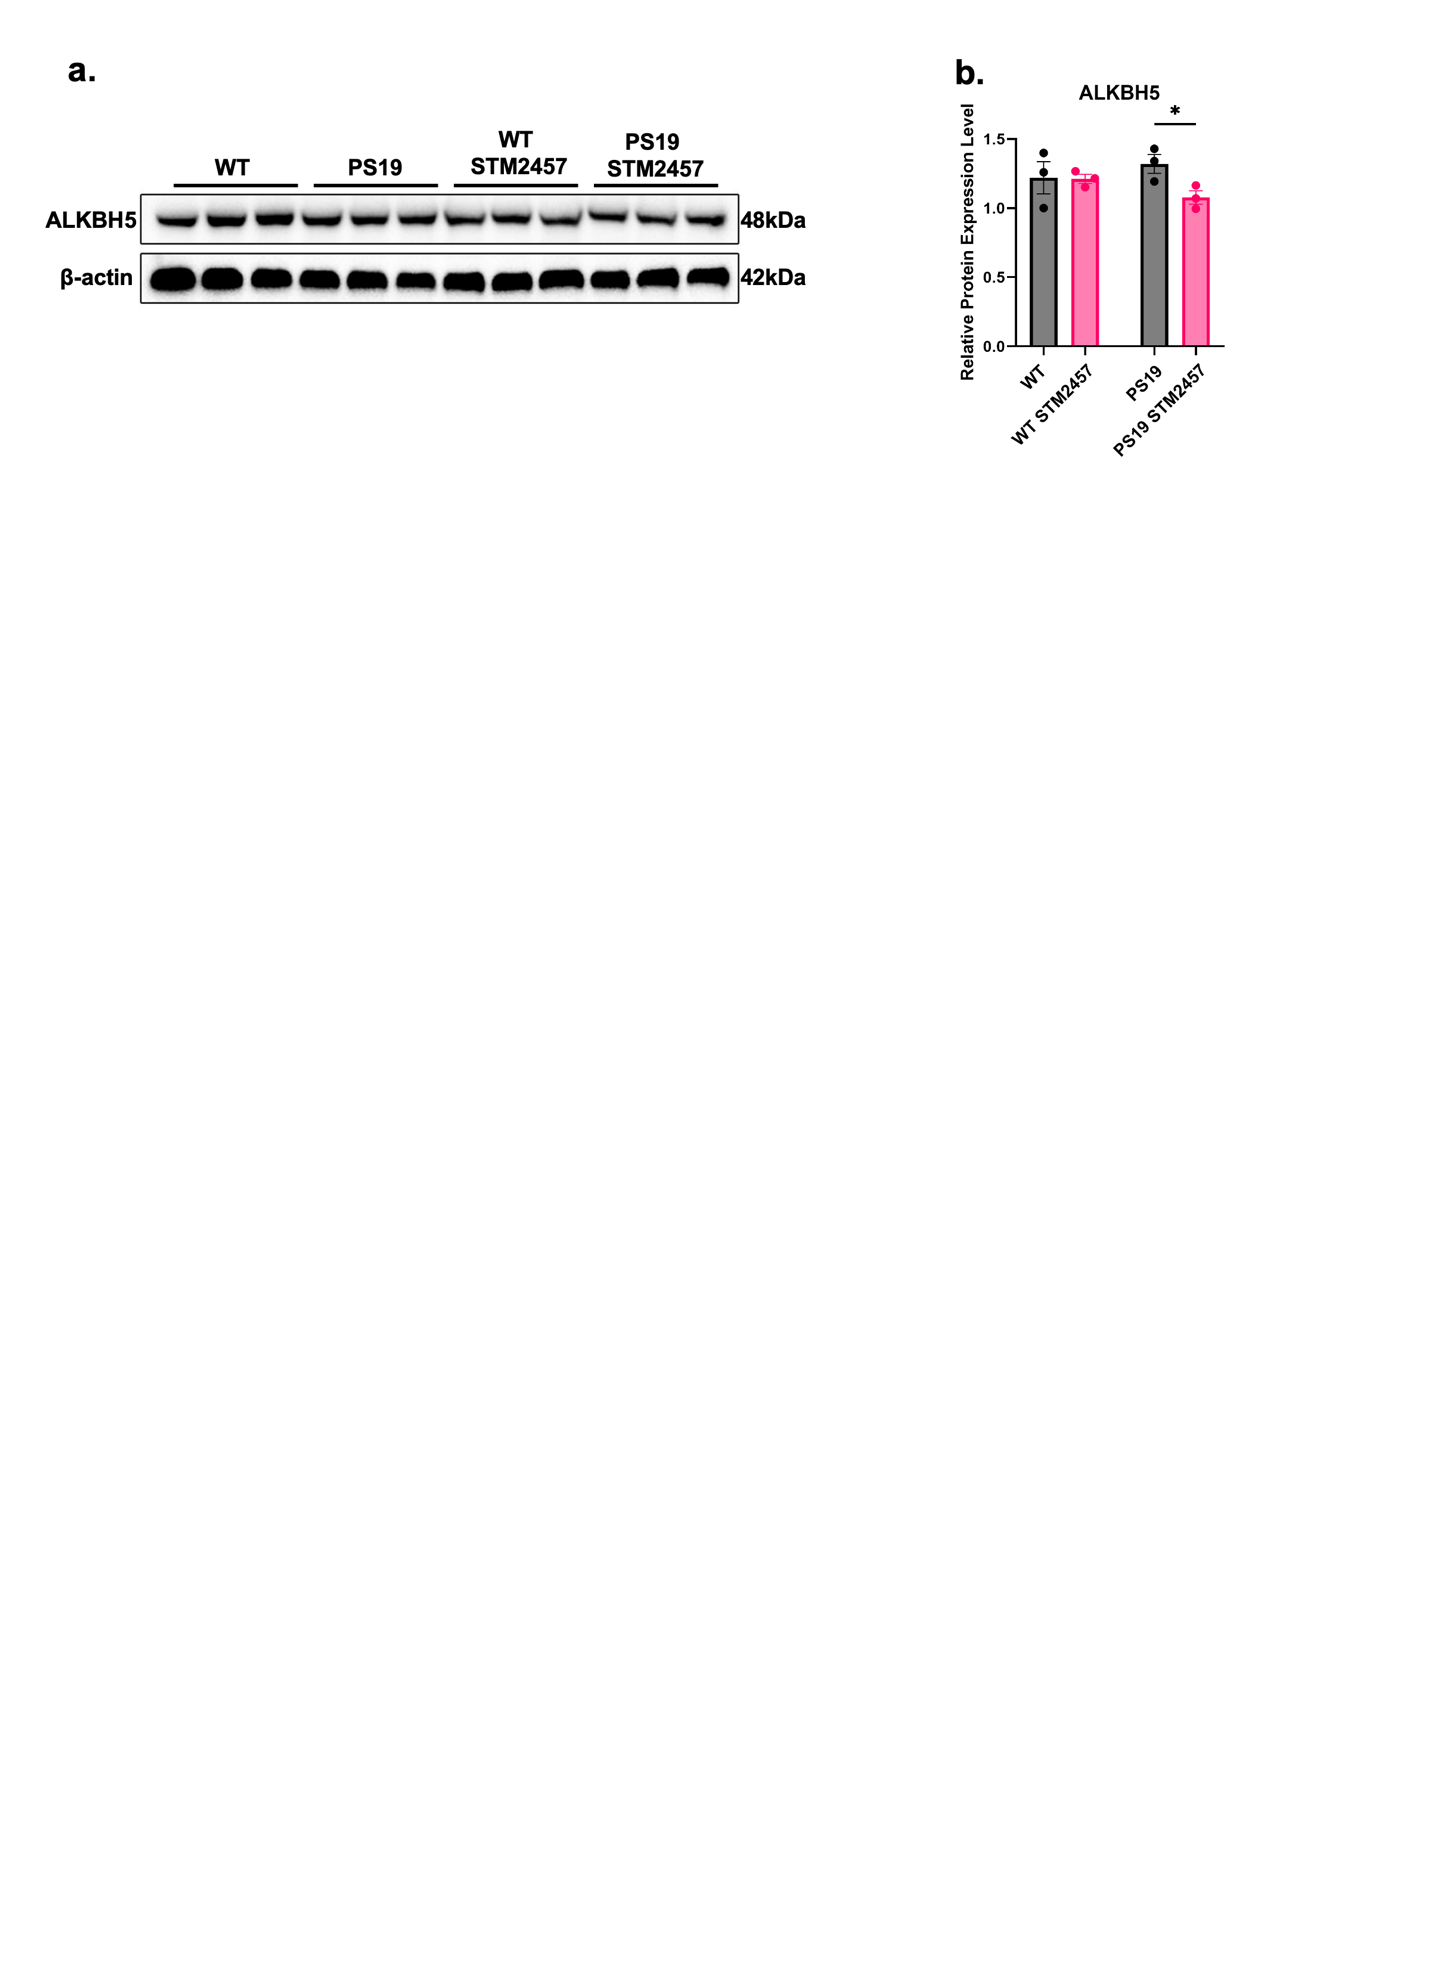
Extended Data Figure 2. Impact of STM2457 treatment on ALKBH5 protein levels in PS19 and WT mice, related to Figure 3. (a)**, Western blot bands of ALKBH5 from PS19 and WT cortical tissue samples, and corresponding β-actin. *N* = 3. **(b)**, Quantification of ALKBH5 expression by Western blot with background subtraction and normalized to β-actin. ***p*<0.01. Error bars = SEM. Statistical analysis performed using two-way ANOVA with Tukey’s multiple comparison test.


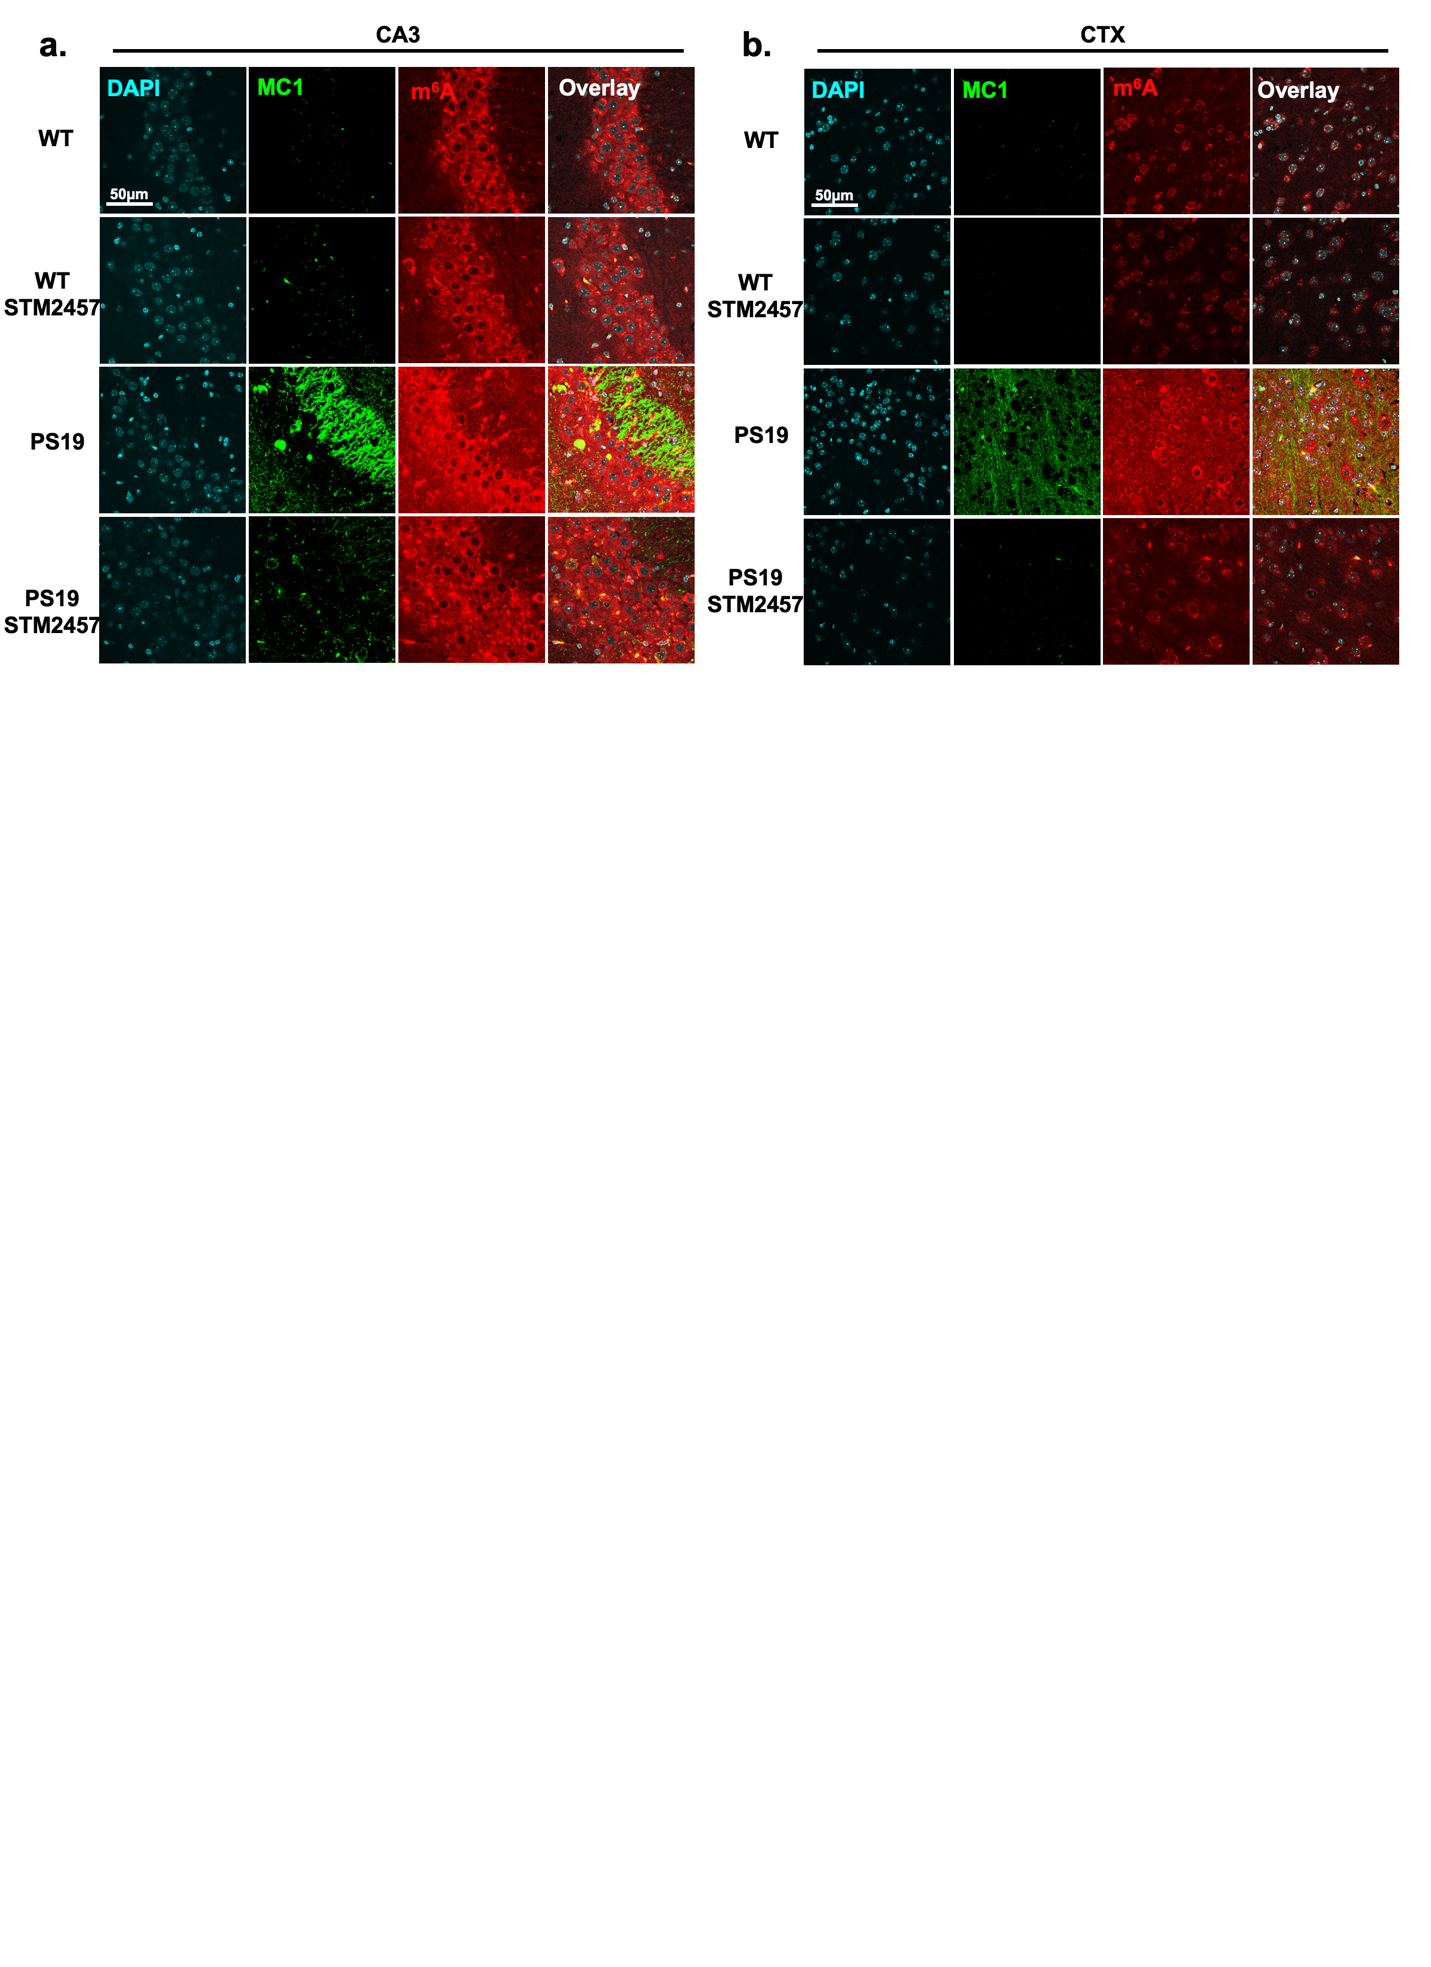


**Extended Data Figure 3. Representative Images of the CA3 and CTX levels of MC1 tau in PS19 control and STM2457-treated mice, related to Figure 5.** **(a)**, Representative immunofluorescence images of the CA3 of WT and PS19 control and STM2457-treated mice with dsDNA stain DAPI (cyan), MC1 misfolded tau (green), and m6A (red). Scale bar = 50µm. **(b)**, Representative immunofluorescence images of the CTX of WT and PS19 control and STM2457 -treated mice with DAPI (cyan), MC1 misfolded tau (green), and m6A (red). Scale bar = 50µm.
